# Supplementary material for: Secular Trend of Self-Concept in the Context of Childhood Obesity—Data from the CHILT III Programme, Cologne
Source: MDPI journal article supplement (doi:10.3390/children10010127), 2023-01-07
Supplement: s1 [file s1]

## Supplemental materials

**Titel:** Secular trend of psychological distress in the context of childhood obesity - data from the CHILT III programme, Cologne

**Authors:** Lisa Grünberg<sup>1</sup>, Nina Eisenburger<sup>1</sup>, Nina Ferrari<sup>1,2</sup>, David Friesen<sup>1</sup>, Fabiola Haas<sup>1</sup>, Marlen Klaudius<sup>1</sup>, Lisa Schmidt<sup>1</sup>, Christine Joisten<sup>1,2</sup>

<sup>1</sup> Department for Physical Activity in Public Health, Institute of Movement and Neurosciences, German Sport University Cologne, Am Sportpark Müngersdorf 6, 50933 Cologne, Germany

<sup>2</sup> Cologne Center for Prevention in Childhood and Youth/Heart Center Cologne, University Hospital of Cologne, Kerpener Str. 62, 50937 Cologne, Germany

### Included supplemental materials:

Table S1-S3

**Table S1:** Descriptive statistics of all time clusters separated by sex

| Overall<br>(boys <i>n</i> = 133)<br>(girls <i>n</i> = 129) | 2005-2006<br>(boys <i>n</i> = 15)<br>(girls <i>n</i> = 25) | 2007-2008<br>(boys <i>n</i> = 19)<br>(girls <i>n</i> = 19) | 2009-2011<br>(boys <i>n</i> = 14)<br>(girls <i>n</i> = 20) | 2012-2014<br>(boys <i>n</i> = 22)<br>(girls <i>n</i> = 20) | 2015-2017<br>(boys <i>n</i> = 20)<br>(girls <i>n</i> = 25) | 2018-2020<br>(boys <i>n</i> = 23)<br>(girls <i>n</i> = 20) | <i>p-value</i>    |
|------------------------------------------------------------|------------------------------------------------------------|------------------------------------------------------------|------------------------------------------------------------|------------------------------------------------------------|------------------------------------------------------------|------------------------------------------------------------|-------------------|
| <b>(1) sex n (%)</b>                                       |                                                            |                                                            |                                                            |                                                            |                                                            |                                                            |                   |
| male                                                       | 15 (37.5%)                                                 | 19 (50.0%)                                                 | 14 (41.2%)                                                 | 22 (52.4%)                                                 | 20 (44.4%)                                                 | 23 (53.5%)                                                 |                   |
| female                                                     | 25 (62.5%)                                                 | 19 (50.0%)                                                 | 20 (58.8%)                                                 | 20 (47.6%)                                                 | 25 (55.6%)                                                 | 20 (46.5%)                                                 |                   |
| <b>(2) age (in years)</b>                                  |                                                            |                                                            |                                                            |                                                            |                                                            |                                                            |                   |
| boys                                                       | 12.2 ± 2.5 (15)                                            | 13.3 ± 1.8 (19)                                            | 12.3 ± 1.9 (14)                                            | 13.0 ± 2.0 (22)                                            | 12.6 ± 2.5 (20)                                            | 12.8 ± 1.7 (23)                                            | .632 <sup>†</sup> |
| girls                                                      | 12.3 ± 1.9 (25)                                            | 12.6 ± 2.2 (19)                                            | 12.9 ± 1.5 (20)                                            | 11.8 ± 3.0 (20)                                            | 12.3 ± 2.1 (25)                                            | 12.0 ± 2.2 (20)                                            | .626 <sup>†</sup> |
| <b>(3) height (in m)</b>                                   |                                                            |                                                            |                                                            |                                                            |                                                            |                                                            |                   |
| boys                                                       | 1.56 ± 0.13 (15)                                           | 1.66 ± 0.12 (19) <sup>‡</sup>                              | 1.58 ± 0.11 (14)                                           | 1.65 ± 0.11 (22) <sup>‡</sup>                              | 1.57 ± 0.14 (20)                                           | 1.62 ± 0.12 (23)                                           | .144 <sup>†</sup> |
| girls                                                      | 1.57 ± 0.09 (25)                                           | 1.57 ± 0.12 (19)                                           | 1.56 ± 0.07 (20)                                           | 1.52 ± 0.09 (20)                                           | 1.55 ± 0.10 (25)                                           | 1.58 ± 0.09 (20)                                           | .506 <sup>†</sup> |
| <b>(4) weight (in kg)</b>                                  |                                                            |                                                            |                                                            |                                                            |                                                            |                                                            |                   |
| boys                                                       | 79.9 ± 24.7 (15)                                           | 83.5 ± 22.0 (19)                                           | 72.5 ± 18.0 (14)                                           | 87.5 ± 16.5 (22) <sup>‡</sup>                              | 78.3 ± 27.2 (20)                                           | 82.6 ± 23.7 (23)                                           | .483 <sup>†</sup> |
| girls                                                      | 71.2 ± 14.8 (25)                                           | 72.9 ± 17.9 (19)                                           | 74.6 ± 12.9 (20)                                           | 67.1 ± 14.7 (20)                                           | 71.3 ± 16.7 (25)                                           | 76.3 ± 17.8 (20)                                           | .547 <sup>†</sup> |
| <b>(5) BMI (in kg/m<sup>2</sup>)</b>                       |                                                            |                                                            |                                                            |                                                            |                                                            |                                                            |                   |
| boys                                                       | 30.6 ± 5.6 (15)                                            | 29.8 ± 4.7 (19)                                            | 28.6 ± 4.2 (14)                                            | 32.1 ± 4.6 (22) <sup>‡</sup>                               | 31.1 ± 7.5 (20)                                            | 30.8 ± 5.0 (23)                                            | .525 <sup>†</sup> |
| girls                                                      | 28.8 ± 4.3 (25)                                            | 29.0 ± 4.1 (19)                                            | 30.5 ± 3.9 (20)                                            | 28.6 ± 3.7 (20)                                            | 29.2 ± 4.6 (25)                                            | 30.1 ± 4.4 (20)                                            | .621 <sup>†</sup> |
| <b>(6) BMI-SDS</b>                                         |                                                            |                                                            |                                                            |                                                            |                                                            |                                                            |                   |
| boys                                                       | 2.53 ± 0.45 (15)                                           | 2.32 ± 0.41 (19)                                           | 2.28 ± 0.51 (14)                                           | 2.57 ± 0.51 (22)                                           | 2.49 ± 0.48 (20)                                           | 2.44 ± 0.47 (23)                                           | .397 <sup>†</sup> |
| girls                                                      | 2.34 ± 0.53 (25)                                           | 2.41 ± 0.39 (19)                                           | 2.51 ± 0.41 (20)                                           | 2.46 ± 0.46 (20)                                           | 2.43 ± 0.44 (25)                                           | 2.58 ± 0.41 (20)                                           | .559 <sup>†</sup> |

| overall<br>(boys <i>n</i> = 97)<br>(girls <i>n</i> = 108) | 2005-2006<br>(boys <i>n</i> = 13)<br>(girls <i>n</i> = 18) | 2007-2008<br>(boys <i>n</i> = 17)<br>(girls <i>n</i> = 19) | 2009-2011<br>(boys <i>n</i> = 14)<br>(girls <i>n</i> = 15) | 2012-2014<br>(boys <i>n</i> = 15)<br>(girls <i>n</i> = 15) | 2015-2017<br>(boys <i>n</i> = 16)<br>(girls <i>n</i> = 23) | 2018-2020<br>(boys <i>n</i> = 22)<br>(girls <i>n</i> = 18) |                    |
|-----------------------------------------------------------|------------------------------------------------------------|------------------------------------------------------------|------------------------------------------------------------|------------------------------------------------------------|------------------------------------------------------------|------------------------------------------------------------|--------------------|
| <b>(7) migration background (yes)</b>                     |                                                            |                                                            |                                                            |                                                            |                                                            |                                                            |                    |
| boys                                                      | 1 (7.7%)                                                   | 1 (5.9%)                                                   | 1 (7.1%)                                                   | 3 (20.0%)                                                  | 1 (6.3%)                                                   | 3 (13.6%)                                                  | .749 <sup>#</sup>  |
| girls                                                     | 1 (5.6%)                                                   | 2 (10.5%)                                                  | 0 (0.0%)                                                   | 3 (20.0%)                                                  | 2 (8.7%)                                                   | 5 (27.8%)                                                  | .148 <sup>#</sup>  |
| <b>(8) media consumption (in h/day)</b>                   |                                                            |                                                            |                                                            |                                                            |                                                            |                                                            |                    |
| boys                                                      | 1.63 ± 0.75 (13)                                           | 1.74 ± 0.96 (17)                                           | 0.89 ± 0.55 (14) <sup>†</sup>                              | 1.39 ± 0.88 (15)                                           | 6.52 ± 4.69 (16)                                           | 6.65 ± 4.42 (22)                                           | <.001 <sup>†</sup> |
| girls                                                     | 2.10 ± 1.30 (18)                                           | 1.60 ± 0.98 (19)                                           | 1.77 ± 1.05 (15)                                           | 1.49 ± 0.92 (15)                                           | 4.37 ± 2.47 (23)                                           | 6.05 ± 3.81 (18)                                           | <.001 <sup>†</sup> |

The data are presented as the mean ± SD; BMI = body mass index; BMI SDS = Body mass index standard deviation score; p-values calculated with the <sup>†</sup> analysis of variance (ANOVA); <sup>‡</sup> unpaired t-test, <sup>#</sup> Chi square test; p < 0.05;

**Table S2:** Results analysing differences in the domains of self-concept over time separated by sex

| periods of time                  |                                                            |                                                            |                                                            |                                                            |                                                            |                                                            |                                                            |                              |
|----------------------------------|------------------------------------------------------------|------------------------------------------------------------|------------------------------------------------------------|------------------------------------------------------------|------------------------------------------------------------|------------------------------------------------------------|------------------------------------------------------------|------------------------------|
|                                  | Overall<br>(boys <i>n</i> = 133)<br>(girls <i>n</i> = 129) | 2005-2006<br>(boys <i>n</i> = 15)<br>(girls <i>n</i> = 25) | 2007-2008<br>(boys <i>n</i> = 19)<br>(girls <i>n</i> = 19) | 2009-2011<br>(boys <i>n</i> = 14)<br>(girls <i>n</i> = 20) | 2012-2014<br>(boys <i>n</i> = 22)<br>(girls <i>n</i> = 20) | 2015-2017<br>(boys <i>n</i> = 20)<br>(girls <i>n</i> = 25) | 2018-2020<br>(boys <i>n</i> = 23)<br>(girls <i>n</i> = 20) | <i>p</i> -value <sup>†</sup> |
| <b>(1) physical appearance</b>   |                                                            |                                                            |                                                            |                                                            |                                                            |                                                            |                                                            |                              |
| boys                             | 55.8 ± 15.4                                                | 50.0 ± 14.7                                                | 52.7 ± 19.3                                                | 57.7 ± 11.4                                                | 54.2 ± 14.3                                                | 59.8 ± 15.7                                                | 59.2 ± 15.0                                                | .269                         |
| girls                            | 53.5 ± 15.9                                                | 49.4 ± 14.6                                                | 50.2 ± 11.9                                                | 57.4 ± 13.2                                                | 57.1 ± 17.4                                                | 54.0 ± 17.9                                                | 53.5 ± 18.8                                                | .220                         |
| <b>(2) social competence</b>     |                                                            |                                                            |                                                            |                                                            |                                                            |                                                            |                                                            |                              |
| boys                             | 75.4 ± 18.8                                                | 75.6 ± 19.2                                                | 70.6 ± 23.1                                                | 80.4 ± 21.5                                                | 72.8 ± 16.9                                                | 73.5 ± 19.7                                                | 80.5 ± 12.9                                                | .505                         |
| girls                            | 76.5 ± 18.4                                                | 78.4 ± 19.5                                                | 80.9 ± 19.4                                                | 78.0 ± 16.6                                                | 79.0 ± 13.1                                                | 71.3 ± 19.1                                                | 72.8 ± 21.0                                                | .519                         |
| <b>(3) scholastic competence</b> |                                                            |                                                            |                                                            |                                                            |                                                            |                                                            |                                                            |                              |
| boys                             | 75.6 ± 16.7                                                | 78.9 ± 18.4                                                | 76.6 ± 14.2                                                | 82.2 ± 16.9                                                | 72.0 ± 17.0                                                | 71.9 ± 14.3                                                | 75.2 ± 19.1                                                | .414                         |
| girls                            | 74.9 ± 16.5                                                | 72.3 ± 20.1                                                | 78.7 ± 15.6                                                | 77.1 ± 12.7                                                | 74.8 ± 14.8                                                | 72.4 ± 17.3                                                | 75.4 ± 17.5                                                | .757                         |
| <b>(4) behavioral conduct</b>    |                                                            |                                                            |                                                            |                                                            |                                                            |                                                            |                                                            |                              |
| boys                             | 73.5 ± 16.7                                                | 75.8 ± 18.0                                                | 70.9 ± 18.5                                                | 83.3 ± 16.3                                                | 73.1 ± 16.8                                                | 67.5 ± 13.6                                                | 73.5 ± 15.8                                                | .219                         |
| girls                            | 74.5 ± 15.9                                                | 74.3 ± 16.9                                                | 78.1 ± 14.6                                                | 77.6 ± 14.9                                                | 70.6 ± 18.8                                                | 74.4 ± 13.4                                                | 72.4 ± 17.1                                                | .579                         |
| <b>(5) global self worth</b>     |                                                            |                                                            |                                                            |                                                            |                                                            |                                                            |                                                            |                              |
| boys                             | 71.9 ± 15.9                                                | 76.3 ± 13.0                                                | 69.9 ± 16.6                                                | 80.7 ± 13.6                                                | 67.4 ± 14.9                                                | 68.2 ± 18.1                                                | 72.9 ± 15.9                                                | .219                         |
| girls                            | 73.4 ± 16.1                                                | 72.6 ± 18.8                                                | 69.8 ± 17.6                                                | 73.5 ± 11.7                                                | 72.5 ± 12.7                                                | 75.2 ± 17.9                                                | 76.3 ± 16.8                                                | .819                         |

The data are presented as the mean  $\pm$  SD; p-values are calculated with an <sup>†</sup> analysis of covariance (ANCOVA) adjusted for age, adolescent status and BMI-SDS

**Table S3:** Results of the ANCOVA analysing the domains of self-concept adjusted for sex, age, BMI SDS, adolescent status, migration background, media consumption and physical fitness

|                           | periods of time      |                       |                       |                       |                       |                       |                       |                             |
|---------------------------|----------------------|-----------------------|-----------------------|-----------------------|-----------------------|-----------------------|-----------------------|-----------------------------|
|                           | Overall<br>(n = 205) | 2005-2006<br>(n = 31) | 2007-2008<br>(n = 36) | 2009-2011<br>(n = 29) | 2012-2014<br>(n = 30) | 2015-2017<br>(n = 39) | 2018-2020<br>(n = 40) | <i>p-value</i> <sup>†</sup> |
| (1) physical appearance   | 54.8 $\pm$ 16.0      | 51.0 $\pm$ 15.1       | 51.4 $\pm$ 15.9       | 59.2 $\pm$ 12.3       | 56.2 $\pm$ 17.2       | 54.7 $\pm$ 16.8       | 56.5 $\pm$ 17.0       | .466                        |
| (2) social competence     | 76.5 $\pm$ 18.4      | 77.2 $\pm$ 17.8       | 76.4 $\pm$ 21.2       | 81.4 $\pm$ 17.8       | 74.9 $\pm$ 15.4       | 72.6 $\pm$ 20.2       | 77.6 $\pm$ 16.7       | .476                        |
| (3) scholastic competence | 76.3 $\pm$ 16.2      | 78.1 $\pm$ 17.4       | 77.7 $\pm$ 15.0       | 80.9 $\pm$ 14.5       | 72.9 $\pm$ 16.2       | 74.0 $\pm$ 15.2       | 74.9 $\pm$ 18.4       | .534                        |
| (4) behavioral conduct    | 74.7 $\pm$ 16.3      | 77.0 $\pm$ 15.9       | 74.4 $\pm$ 17.2       | 83.1 $\pm$ 14.2       | 70.8 $\pm$ 17.4       | 71.8 $\pm$ 13.9       | 72.8 $\pm$ 16.6       | .101                        |
| (5) global self worth     | 73.1 $\pm$ 16.6      | 76.0 $\pm$ 16.6       | 69.7 $\pm$ 17.2       | 77.9 $\pm$ 13.1       | 69.0 $\pm$ 15.6       | 72.2 $\pm$ 19.0       | 74.2 $\pm$ 16.3       | .237                        |

The data are presented as the mean  $\pm$  SD; p-values are calculated with an <sup>†</sup> analysis of covariance (ANCOVA) adjusted by sex, age, BMI SDS, adolescent status, migration background, media consumption and physical fitness
